# Supplementary material for: Cyclic bis(β-diketonate)- and bis(β-ketoesterate)-bridged titanium and zirconium alkoxide derivatives
Source: Royal Society of Chemistry journal article supplement (doi:10.1039/c1dt11780g), 2011-12-21

## Electronic supplementary information

### C1DT11780G

#### Cyclic bis( $\beta$ -diketonate)- and bis( $\beta$ -ketoesterate)-bridged titanium and zirconium alkoxide derivatives

U. Schubert et. al.

**Table S1** Comparison of calculated (relative to TMS) and measured  $^{13}\text{C}$  NMR shifts (ppm) for  $[\text{TiL}^1(\text{O}i\text{Pr})_2]_2$  (**1**)

|                              | Calculated data <i>cis/cis</i> -<br>isomer | Experimental<br>data | Calculated data<br><i>trans/trans</i> -isomer |
|------------------------------|--------------------------------------------|----------------------|-----------------------------------------------|
| $\text{CH}_3\text{COCHCO}$   | 27.3/ 26.6                                 | 29.3/ 29.2           | 27.1/ 27.0                                    |
| $\text{CH}_3\text{COCHCO}$   | 179.6/ 178.8                               | 189.9/ 187.0         | 182.3/ 182.7                                  |
| $\text{COCHCO}$              | 97.9/ 97.6                                 | 101.9/ 101.0         | 100.1/ 99.2                                   |
| $\text{CHCOCH}_2$            | 186.4/ 185.9                               | 193.7/191.0          | 184.4/ 184.9                                  |
| $\text{CHCOCH}_2\text{CH}_2$ | 44.5/ 44.4                                 | 39.7/ 38.9           | 42.5/ 52.4                                    |

**Figure S1**  $^{13}\text{C}$  NMR spectrum of  $[\text{TiL}^1(\text{O}i\text{Pr})_2]_2$  (**1**)

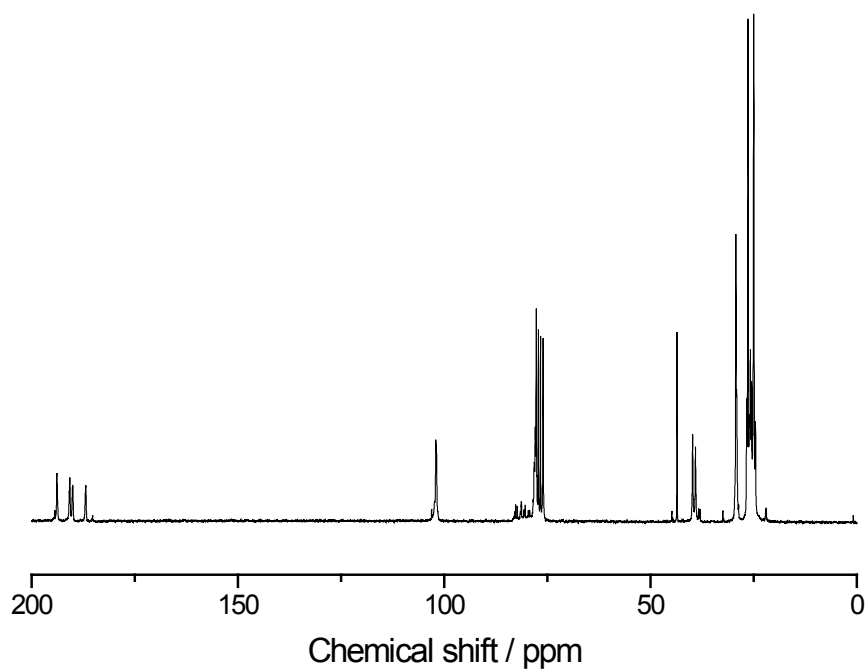



**Figure S2** MS/MS spectrum of  $[\text{TiL}^6(\text{OiPr})_2]_2$  (**9**)

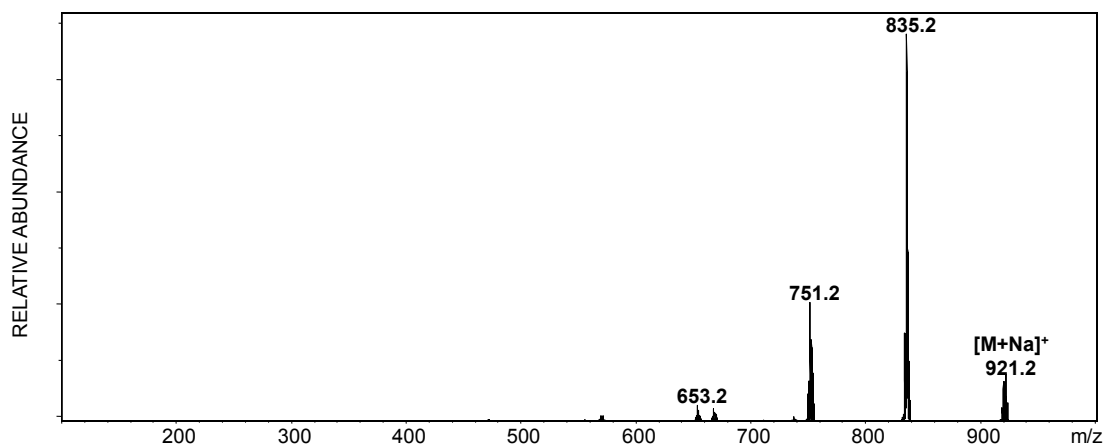

**Figure S3** MS/MS spectrum of  $[\text{ZrL}^6(\text{OiPr})_2]_2$  (**11**)

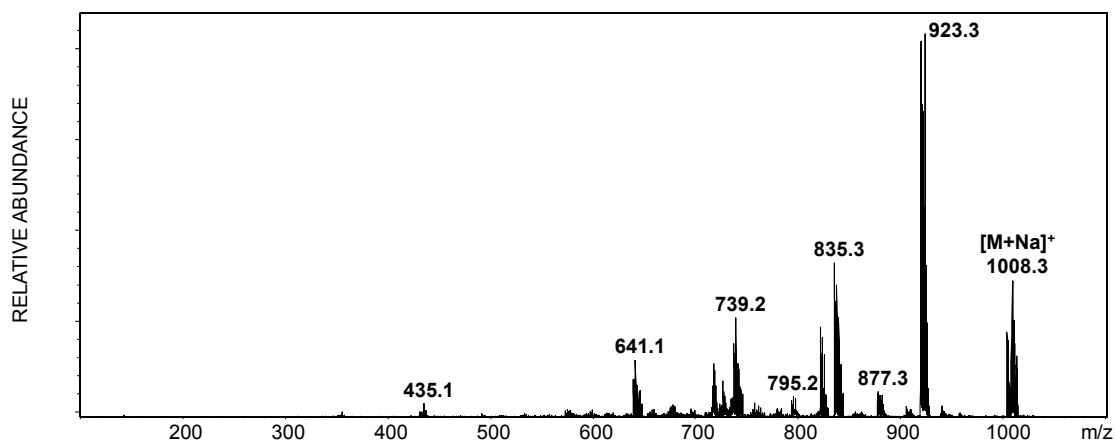

Supplement: c1dt11780g.pdf [file c1dt11780g.pdf]
